# Supplementary material
Source: PubMed Central journal article supplement (PMC4142588)
Supplement: NIHMS622461-supplement-Supplement.pdf [file NIHMS622461-supplement-Supplement.pdf]

**ONLINE-ONLY MATERIAL**

**TITLE: Cadmium Exposure and Incident Cardiovascular Disease: A Population-Based Prospective Cohort Study**

**AUTHORS:** Maria Tellez-Plaza, Eliseo Guallar, Barbara V. Howard, Jason G. Umans, Kevin A. Francesconi, Walter Goessler, Ellen K. Silbergeld, Richard B. Devereux, Ana Navas-Acien

**eFigure 1. Hazard ratios (95% confidence interval) for cardiovascular disease mortality comparing the 80th versus the 20th percentiles of the urine cadmium distribution by participants characteristics at baseline (N=3,348)**

**eFigure 2. Hazard ratios (95% confidence interval) for cardiovascular disease incidence comparing the 80th versus the 20th percentiles of the urine cadmium distribution by participants characteristics at baseline (N=3,348)**

**eFigure 1. Hazard ratios (95% confidence interval) for cardiovascular disease mortality comparing the 80th versus the 20th percentiles of the urine cadmium distribution by participants characteristics at baseline (N=3,348)**

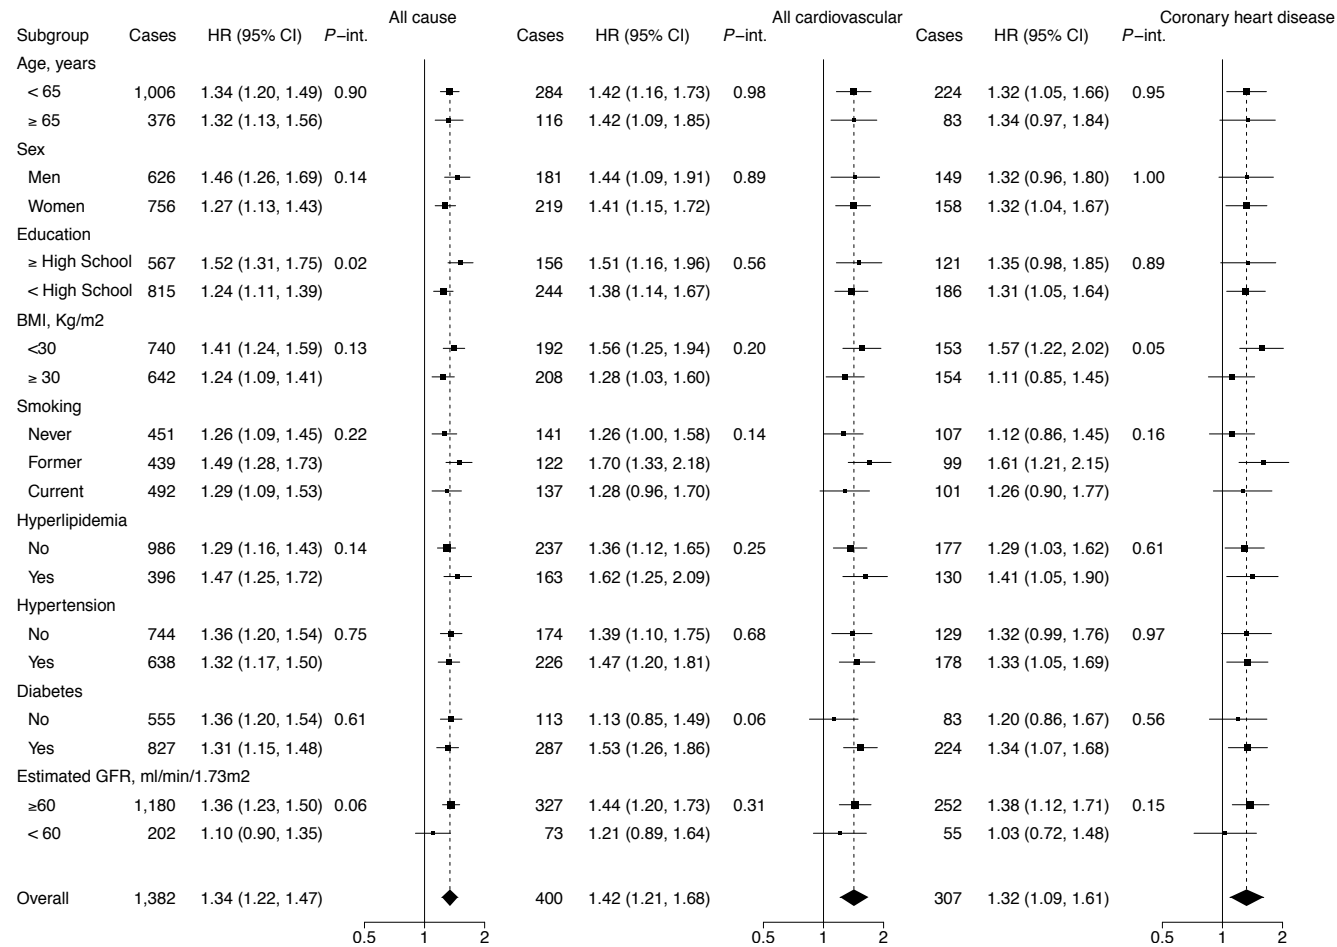

The 80th and 20th percentiles of the urine cadmium distribution were 1.62 and 0.55  $\mu\text{g/g}$  creatinine, respectively. Hazard ratios for the subgroups of interest and associated P for interaction were obtained from Cox proportional hazards models with log-transformed cadmium as a continuous variable. Models were adjusted for sex, post-menopausal status for women (yes, no), education (< high school,  $\geq$  high school), body mass index ( $\text{kg/m}^2$ ), total cholesterol ( $\text{mg/dL}$ ), estimated LDL- cholesterol ( $\text{mg/dL}$ ), hypertension (yes, no), diabetes (yes, no), and estimated glomerular filtration rate ( $\text{ml/min}/1.73\text{m}^2$ ), smoking status (never, former, current) and cumulative smoking dose (pack-years modeled as restricted cubic splines with knots at 10, 20 and 30 pack-years).

**eFigure 2. Hazard ratios (95% confidence interval) for cardiovascular disease incidence comparing the 80th versus the 20th percentiles of the urine cadmium distribution by participants characteristics at baseline (N=3,348)**

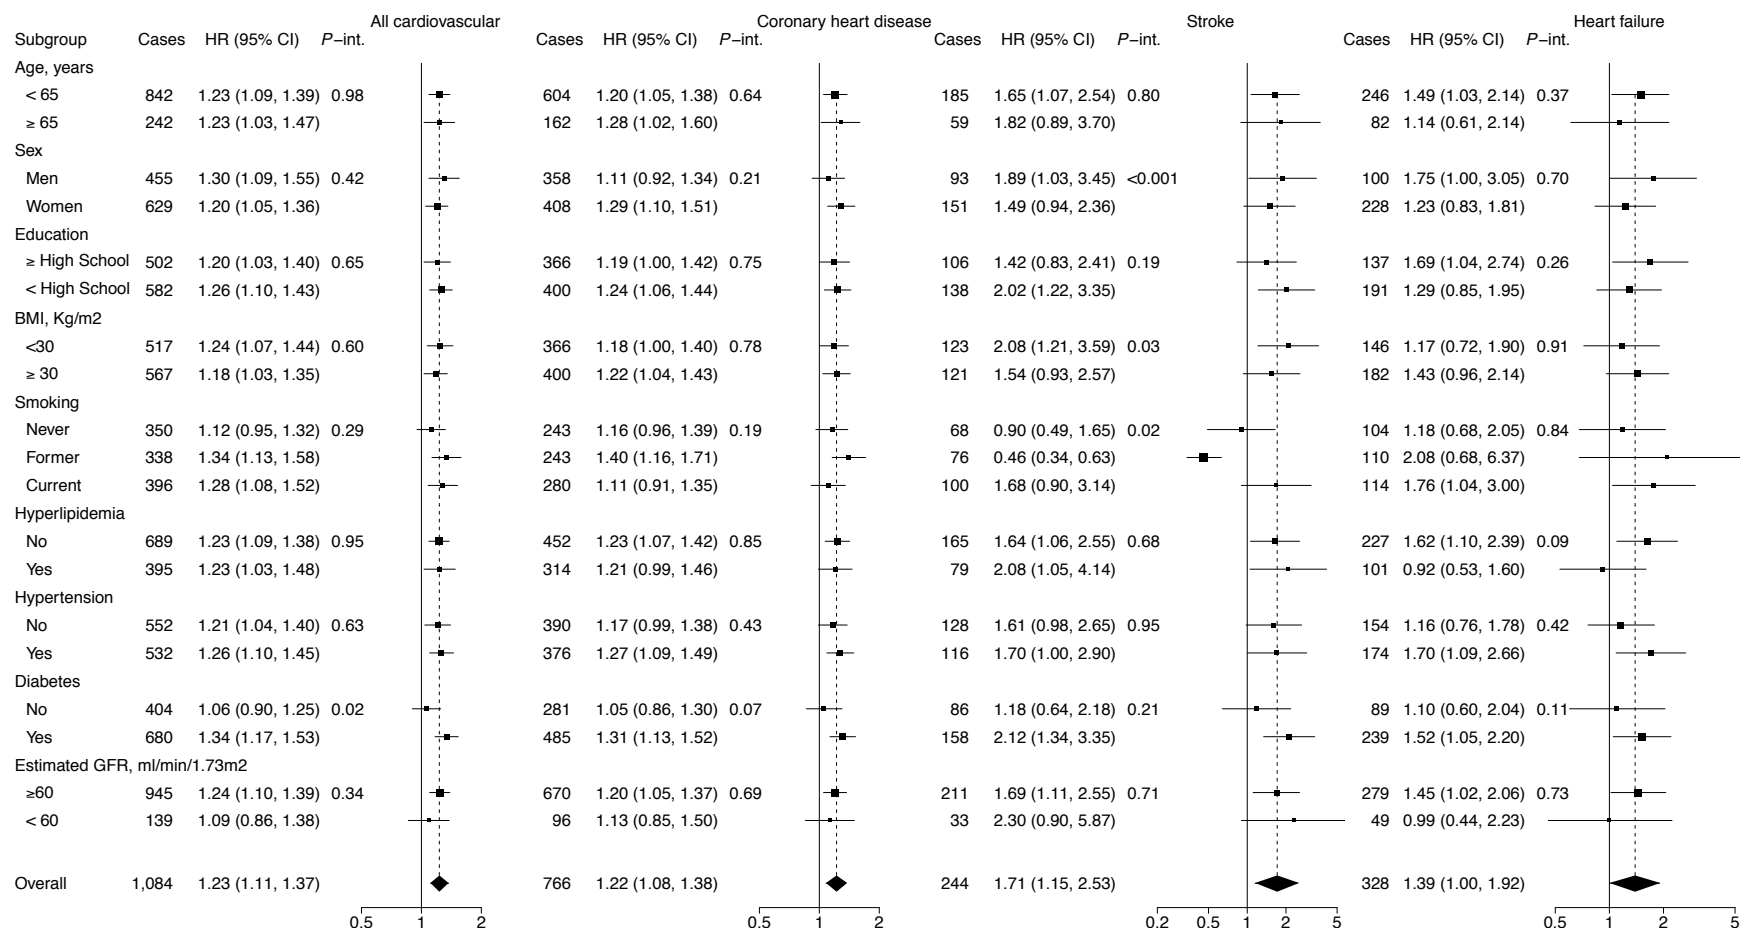

The 80th and 20th percentiles of the urine cadmium distribution were 1.62 and 0.55  $\mu\text{g/g}$  creatinine, respectively. Hazard ratios for the subgroups of interest and associated P for interaction were obtained from Cox proportional hazards models with log-transformed cadmium as a continuous variable, except for stroke and heart failure where cadmium was introduced as restricted quadratic splines with knots at percentiles 10th, 50th and 90th. Models were adjusted for sex, post-menopausal status for women (yes, no), education (< high school,  $\geq$  high school), body mass index ( $\text{kg}/\text{m}^2$ ), total cholesterol ( $\text{mg}/\text{dL}$ ), estimated LDL-cholesterol ( $\text{mg}/\text{dL}$ ), hypertension (yes, no), diabetes (yes, no), and estimated glomerular filtration rate ( $\text{ml}/\text{min}/1.73\text{m}^2$ ), smoking status (never, former, current) and cumulative smoking dose (pack-years modeled as restricted cubic splines with knots at 10, 20 and 30 pack-years).
